# Supplementary material
Source: PubMed Central journal article supplement (PMC7309318)
Supplement: sb0c00045_si_001.pdf [file sb0c00045_si_001.pdf]

# Supplementary material for:

Design and experimental evaluation of a minimal, innocuous watermarking strategy to distinguish near-identical DNA and RNA sequences

Francine J. Boonekamp<sup>1#</sup>, Sofia Dashko<sup>1#</sup>, Donna Duiker<sup>1</sup>, Thies Gehrman<sup>2</sup>, Marcel van den Broek<sup>1</sup>, Maxime den Ridder<sup>1</sup>, Martin Pabst<sup>1</sup>, Vincent Robert<sup>2</sup>, Thomas Abeel<sup>1</sup>, Eline D. Postma<sup>1</sup>, Jean-Marc Daran<sup>1</sup>, Pascale Daran-Lapujade<sup>1,#</sup>

**Table S1 – Codon usage in *S. cerevisiae***

Codons used for codon optimization and their abundance (data from <https://www.yeastgenome.org/>)

| <b>Amino acid</b> | <b>codon</b> | <b>Total nb<sup>a</sup></b> | <b>/1000<sup>b</sup></b> | <b>Fraction<sup>c</sup></b> |
|-------------------|--------------|-----------------------------|--------------------------|-----------------------------|
| <b>Ala</b>        | GCG          | 17988                       | 6.16                     | 0.11                        |
|                   | GCA          | 47538                       | 16.27                    | 0.3                         |
|                   | GCT          | 59300                       | 20.29                    | 0.37                        |
|                   | GCC          | 35410                       | 12.12                    | 0.22                        |
| <b>Arg</b>        | AGG          | 27561                       | 9.43                     | 0.21                        |
|                   | AGA          | 61537                       | 21.06                    | 0.48                        |
|                   | CGG          | 5299                        | 1.81                     | 0.04                        |
|                   | CGA          | 9050                        | 3.1                      | 0.07                        |
|                   | CGT          | 18272                       | 6.25                     | 0.14                        |
|                   | CGC          | 7644                        | 2.62                     | 0.06                        |
| <b>Gly</b>        | GGG          | 17673                       | 6.05                     | 0.12                        |
|                   | GGA          | 32723                       | 11.2                     | 0.23                        |
|                   | GGT          | 66198                       | 22.66                    | 0.46                        |
|                   | GGC          | 28522                       | 9.76                     | 0.2                         |
| <b>Leu</b>        | TTG          | 77261                       | 26.44                    | 0.28                        |
|                   | TTA          | 77615                       | 26.56                    | 0.28                        |
|                   | CTG          | 31054                       | 10.63                    | 0.11                        |
|                   | CTA          | 39440                       | 13.5                     | 0.14                        |
|                   | CTT          | 35753                       | 12.24                    | 0.13                        |
|                   | CTC          | 16086                       | 5.51                     | 0.06                        |
| <b>Pro</b>        | CCG          | 15778                       | 5.4                      | 0.12                        |
|                   | CCA          | 51993                       | 17.79                    | 0.41                        |
|                   | CCT          | 39685                       | 13.58                    | 0.31                        |
|                   | CCC          | 20139                       | 6.89                     | 0.16                        |
| <b>Ser</b>        | AGT          | 42657                       | 14.6                     | 0.16                        |
|                   | AGC          | 29003                       | 9.93                     | 0.11                        |
|                   | TCG          | 25381                       | 8.69                     | 0.1                         |
|                   | TCA          | 55725                       | 19.07                    | 0.21                        |
|                   | TCT          | 68207                       | 23.34                    | 0.26                        |
|                   | TCC          | 40972                       | 14.02                    | 0.16                        |
| <b>Thr</b>        | ACG          | 23766                       | 8.13                     | 0.14                        |
|                   | ACA          | 53147                       | 18.19                    | 0.31                        |
|                   | ACT          | 59096                       | 20.23                    | 0.34                        |
|                   | ACC          | 36395                       | 12.46                    | 0.21                        |
| <b>Val</b>        | GTG          | 31266                       | 10.7                     | 0.19                        |
|                   | GTA          | 35397                       | 12.11                    | 0.22                        |
|                   | GTT          | 62735                       | 21.47                    | 0.39                        |
|                   | GTC          | 32738                       | 11.2                     | 0.2                         |

<sup>a</sup> Total number of occurrences of this codon in the yeast genome

<sup>b</sup> Number of occurrences of this codon per 1000 codons in the yeast genome

<sup>c</sup> Fraction of occurrence of this codon usage from the set of codons representing the same amino acid

**Table S2 – Watermarked glycolytic genes**

List of watermarks introduced in the glycolytic and fermentative genes and of the resulting change in codon usage

| <i>Gene</i>                                 | Position (bp) | Native codon | WM codon | Fraction of native codon <sup>a</sup> | Fraction of WM codon <sup>b</sup> | Change in fraction (a-b) |
|---------------------------------------------|---------------|--------------|----------|---------------------------------------|-----------------------------------|--------------------------|
| <i>TPI1</i>                                 | 375           | TTG          | TTA      | 0.28                                  | 0.28                              | 0                        |
|                                             | 408           | GCC          | GCA      | 0.22                                  | 0.3                               | 0.08                     |
|                                             | 420           | TTG          | TTA      | 0.28                                  | 0.28                              | 0                        |
|                                             | 441           | TTG          | TTA      | 0.28                                  | 0.28                              | 0                        |
|                                             | 453           | TTG          | TTA      | 0.28                                  | 0.28                              | 0                        |
|                                             | 645           | AGC          | AGT      | 0.11                                  | 0.16                              | 0.05                     |
|                                             | 651           | GCC          | GCA      | 0.22                                  | 0.3                               | 0.08                     |
|                                             | 657           | ACC          | ACA      | 0.21                                  | 0.31                              | 0.1                      |
|                                             | 678           | GTC          | GTA      | 0.2                                   | 0.22                              | 0.02                     |
|                                             | 693           | GTC          | GTA      | 0.2                                   | 0.22                              | 0.02                     |
|                                             | 708           | TTG          | TTA      | 0.28                                  | 0.28                              | 0                        |
| <i>Sum of all substitutions<sup>c</sup></i> |               |              |          |                                       |                                   | <b>0.35</b>              |
| <i>FBA1</i>                                 | 558           | GTT          | GTC      | 0.39                                  | 0.2                               | -0.19                    |
|                                             | 573           | GCT          | GCC      | 0.37                                  | 0.22                              | -0.15                    |
|                                             | 588           | TTG          | TTA      | 0.28                                  | 0.28                              | 0                        |
|                                             | 618           | GTC          | GTT      | 0.2                                   | 0.39                              | 0.19                     |
|                                             | 630           | TTG          | TTA      | 0.28                                  | 0.28                              | 0                        |
|                                             | 1005          | GTT          | GTC      | 0.39                                  | 0.2                               | -0.19                    |
|                                             | 999           | GTC          | GTT      | 0.2                                   | 0.39                              | 0.19                     |
|                                             | 1023          | ACC          | ACA      | 0.21                                  | 0.31                              | 0.1                      |
|                                             | 1041          | ACC          | ACA      | 0.21                                  | 0.31                              | 0.1                      |
|                                             | 1065          | ACC          | ACA      | 0.21                                  | 0.31                              | 0.1                      |
| <i>Sum of all substitutions</i>             |               |              |          |                                       |                                   | <b>1.21</b>              |
| <i>GPM1</i>                                 | 381           | TCT          | TCA      | 0.26                                  | 0.21                              | -0.05                    |
|                                             | 393           | TCT          | TCA      | 0.26                                  | 0.21                              | -0.05                    |
|                                             | 435           | GTC          | GTA      | 0.2                                   | 0.22                              | 0.02                     |
|                                             | 447           | ACT          | ACA      | 0.34                                  | 0.31                              | -0.03                    |
|                                             | 456           | TTG          | TTA      | 0.28                                  | 0.28                              | 0                        |
|                                             | 462           | TTG          | TTA      | 0.28                                  | 0.28                              | 0                        |
|                                             | 639           | GTC          | GTA      | 0.2                                   | 0.22                              | 0.02                     |
|                                             | 660           | TTG          | TTA      | 0.28                                  | 0.28                              | 0                        |
|                                             | 699           | GCT          | GCC      | 0.37                                  | 0.22                              | -0.15                    |
|                                             | 702           | GCC          | GCT      | 0.22                                  | 0.37                              | 0.15                     |
|                                             | 726           | GCC          | GCA      | 0.22                                  | 0.3                               | 0.08                     |
| <i>Sum of all substitutions</i>             |               |              |          |                                       |                                   | <b>0.55</b>              |
| <i>HXK2</i>                                 | 735           | TCC          | TCA      | 0.16                                  | 0.21                              | 0.05                     |

|                                 |      |     |      |      |             |       |
|---------------------------------|------|-----|------|------|-------------|-------|
| 750                             | CTA  | CTT | 0.14 | 0.13 | -0.01       |       |
| 762                             | CTA  | CTT | 0.14 | 0.13 | -0.01       |       |
| 795                             | GCC  | GCA | 0.22 | 0.3  | 0.08        |       |
| 816                             | TCC  | TCA | 0.16 | 0.21 | 0.05        |       |
| 1365                            | CCT  | CCC | 0.31 | 0.16 | -0.15       |       |
| 1380                            | TCC  | TCA | 0.16 | 0.21 | 0.05        |       |
| 1392                            | GCC  | GCA | 0.22 | 0.3  | 0.08        |       |
| 1413                            | GCC  | GCA | 0.22 | 0.3  | 0.08        |       |
| 1440                            | TCC  | TCA | 0.16 | 0.21 | 0.05        |       |
| <i>Sum of all substitutions</i> |      |     |      |      | <b>0.61</b> |       |
| <i>PDC1</i>                     | 885  | GTC | GTA  | 0.2  | 0.22        | 0.02  |
|                                 | 867  | TTG | TTA  | 0.28 | 0.28        | 0     |
|                                 | 882  | ACC | ACA  | 0.21 | 0.31        | 0.1   |
|                                 | 909  | ACC | ACA  | 0.21 | 0.31        | 0.1   |
|                                 | 933  | TCC | TCA  | 0.16 | 0.21        | 0.05  |
|                                 | 1593 | TCT | TCA  | 0.26 | 0.21        | -0.05 |
|                                 | 1626 | GTC | GTA  | 0.2  | 0.22        | 0.02  |
|                                 | 1647 | TTG | TTA  | 0.28 | 0.28        | 0     |
|                                 | 1665 | TTG | TTA  | 0.28 | 0.28        | 0     |
|                                 | 1677 | ACC | ACA  | 0.21 | 0.31        | 0.1   |
| <i>Sum of all substitutions</i> |      |     |      |      | <b>0.44</b> |       |
| <i>PFK1</i>                     | 1506 | TTA | TTG  | 0.28 | 0.28        | 0     |
|                                 | 1512 | ACT | ACA  | 0.34 | 0.31        | -0.03 |
|                                 | 1515 | CTA | CTT  | 0.14 | 0.13        | -0.01 |
|                                 | 1545 | CTG | CTT  | 0.11 | 0.13        | 0.02  |
|                                 | 1554 | ACC | ACA  | 0.21 | 0.31        | 0.1   |
|                                 | 1563 | ACT | ACA  | 0.34 | 0.31        | -0.03 |
|                                 | 1575 | TTA | TTG  | 0.28 | 0.28        | 0     |
|                                 | 2880 | GCT | GCC  | 0.37 | 0.22        | -0.15 |
|                                 | 2907 | CTG | CTT  | 0.11 | 0.13        | 0.02  |
|                                 | 2910 | TCC | TCA  | 0.16 | 0.21        | 0.05  |
|                                 | 2937 | GTA | GTG  | 0.22 | 0.19        | -0.03 |
|                                 | 2940 | GCC | GCA  | 0.22 | 0.3         | 0.08  |
|                                 | 2946 | TTA | TTG  | 0.28 | 0.28        | 0     |
|                                 | 2949 | GCC | GCA  | 0.22 | 0.3         | 0.08  |
| <i>Sum of all substitutions</i> |      |     |      |      | <b>0.6</b>  |       |
| <i>PFK2</i>                     | 1461 | ACT | ACA  | 0.34 | 0.31        | -0.03 |
|                                 | 1479 | CGT | CGA  | 0.14 | 0.07        | -0.07 |
|                                 | 1494 | TTA | TTG  | 0.28 | 0.28        | 0     |
|                                 | 1503 | CTT | CTA  | 0.13 | 0.14        | 0.01  |
|                                 | 1530 | TCC | TCA  | 0.16 | 0.21        | 0.05  |
|                                 | 2775 | TTG | TTA  | 0.28 | 0.28        | 0     |
|                                 | 2799 | TCC | TCA  | 0.16 | 0.21        | 0.05  |
|                                 | 2817 | GTC | GTA  | 0.2  | 0.22        | 0.02  |
|                                 | 2841 | CTC | CTG  | 0.06 | 0.11        | 0.05  |

|             |                                 |     |     |      |      |             |
|-------------|---------------------------------|-----|-----|------|------|-------------|
|             | 2862                            | GGA | GGC | 0.23 | 0.2  | -0.03       |
|             | <i>Sum of all substitutions</i> |     |     |      |      | <b>0.31</b> |
| <i>PGI1</i> | 837                             | GTC | GTA | 0.2  | 0.22 | 0.02        |
|             | 855                             | GTC | GTA | 0.2  | 0.22 | 0.02        |
|             | 861                             | TCG | TCC | 0.1  | 0.16 | 0.06        |
|             | 882                             | GCC | GCA | 0.22 | 0.3  | 0.08        |
|             | 894                             | GGC | GGA | 0.2  | 0.23 | 0.03        |
|             | 1563                            | GTC | GTA | 0.2  | 0.22 | 0.02        |
|             | 1581                            | GGC | GGA | 0.2  | 0.23 | 0.03        |
|             | 1599                            | TCC | TCA | 0.16 | 0.21 | 0.05        |
|             | 1611                            | TCT | TCA | 0.26 | 0.21 | -0.05       |
|             | 1629                            | ACC | ACA | 0.21 | 0.31 | 0.1         |
|             | <i>Sum of all substitutions</i> |     |     |      |      | <b>0.46</b> |
| <i>PGK1</i> | 630                             | TTA | TTG | 0.28 | 0.28 | 0           |
|             | 639                             | GCC | GCA | 0.22 | 0.3  | 0.08        |
|             | 663                             | TTG | TTA | 0.28 | 0.28 | 0           |
|             | 687                             | GTC | GTA | 0.2  | 0.22 | 0.02        |
|             | 693                             | TCT | TCA | 0.26 | 0.21 | -0.05       |
|             | 1164                            | TCC | TCA | 0.16 | 0.21 | 0.05        |
|             | 1176                            | ACT | ACA | 0.34 | 0.31 | -0.03       |
|             | 1200                            | TTA | TTG | 0.28 | 0.28 | 0           |
|             | 1218                            | TTG | TTA | 0.28 | 0.28 | 0           |
|             | 1239                            | TCC | TCA | 0.16 | 0.21 | 0.05        |
|             | <i>Sum of all substitutions</i> |     |     |      |      | <b>0.28</b> |
| <i>PYK1</i> | 762                             | TTG | TTA | 0.28 | 0.28 | 0           |
|             | 789                             | GCC | GCA | 0.22 | 0.3  | 0.08        |
|             | 819                             | GCC | GCA | 0.22 | 0.3  | 0.08        |
|             | 837                             | GTC | GTA | 0.2  | 0.22 | 0.02        |
|             | 849                             | TTG | TTA | 0.28 | 0.28 | 0           |
|             | 1419                            | TTG | TTA | 0.28 | 0.28 | 0           |
|             | 1443                            | TCC | TCA | 0.16 | 0.21 | 0.05        |
|             | 1461                            | GCC | GCA | 0.22 | 0.3  | 0.08        |
|             | 1476                            | TCC | TCA | 0.16 | 0.21 | 0.05        |
|             | 1491                            | GTC | GTA | 0.2  | 0.22 | 0.02        |
|             | <i>Sum of all substitutions</i> |     |     |      |      | <b>0.38</b> |
| <i>TDH3</i> | 516                             | TTG | TTA | 0.28 | 0.28 | 0           |
|             | 522                             | ACC | ACA | 0.21 | 0.31 | 0.1         |
|             | 555                             | ACT | ACA | 0.34 | 0.31 | -0.03       |
|             | 570                             | TCC | TCA | 0.16 | 0.21 | 0.05        |
|             | 597                             | ACC | ACA | 0.21 | 0.31 | 0.1         |
|             | 903                             | TTG | TTA | 0.28 | 0.28 | 0           |
|             | 918                             | GTC | GTA | 0.2  | 0.22 | 0.02        |
|             | 930                             | TCC | TCA | 0.16 | 0.21 | 0.05        |
|             | 960                             | ACC | ACA | 0.21 | 0.31 | 0.1         |
|             | 975                             | TTG | TTA | 0.28 | 0.28 | 0           |

| <i>Sum of all substitutions</i> |      |     |     |      |      | <b>0.45</b> |
|---------------------------------|------|-----|-----|------|------|-------------|
| <i>ADH1</i>                     | 531  | TCC | TCA | 0.16 | 0.21 | 0.05        |
|                                 | 549  | CTA | CTT | 0.14 | 0.13 | -0.01       |
|                                 | 558  | TTG | TTA | 0.28 | 0.28 | 0           |
|                                 | 573  | GCC | GCA | 0.22 | 0.3  | 0.08        |
|                                 | 597  | TTG | TTA | 0.28 | 0.28 | 0           |
|                                 | 939  | TTG | TTA | 0.28 | 0.28 | 0           |
|                                 | 942  | GTC | GTA | 0.2  | 0.22 | 0.02        |
|                                 | 966  | GGC | GGA | 0.2  | 0.23 | 0.03        |
|                                 | 978  | TTG | TTA | 0.28 | 0.28 | 0           |
|                                 | 1029 | GTT | GTC | 0.39 | 0.2  | -0.19       |
|                                 | 1032 | GTT | GTC | 0.39 | 0.2  | -0.19       |
| <i>Sum of all substitutions</i> |      |     |     |      |      | <b>0.57</b> |
| <i>ENO2</i>                     | 663  | ACC | ACA | 0.21 | 0.31 | 0.1         |
|                                 | 678  | TTG | TTA | 0.28 | 0.28 | 0           |
|                                 | 684  | TTG | TTA | 0.28 | 0.28 | 0           |
|                                 | 726  | GTC | GTA | 0.2  | 0.22 | 0.02        |
|                                 | 738  | TTG | TTA | 0.28 | 0.28 | 0           |
|                                 | 750  | TCC | TCA | 0.16 | 0.21 | 0.05        |
|                                 | 1212 | TCC | TCA | 0.16 | 0.21 | 0.05        |
|                                 | 1242 | TTG | TTA | 0.28 | 0.28 | 0           |
|                                 | 1260 | TTG | TTA | 0.28 | 0.28 | 0           |
|                                 | 1272 | GCT | GCC | 0.37 | 0.22 | -0.15       |
|                                 | 1281 | GCC | GCA | 0.22 | 0.3  | 0.08        |
| <i>Sum of all substitutions</i> |      |     |     |      |      | <b>0.45</b> |

<sup>a</sup> and <sup>b</sup>, fraction of occurrence of this codon is used from the set of codons representing the same amino acid according to Table S1

<sup>c</sup>, sum of all substitutions for each watermarked gene, calculated as  $\sum_{i=1}^n (|a_i - b_i|)$

**Table S3 – Comparing Alignment and markerQuant for differential quantification of watermarked and native glycolytic transcripts**

Here, we show, for simulated data, the ability of markerQuant and STAR<sup>1</sup> to retrieve the real count of reads originating from either the native sequence, or the watermarked sequence. As for evaluating the watermarking method, we simulated RNA-Sequencing reads using the polyester R package<sup>2</sup>. We compared the % retrieval between STAR and markerQuant. For STAR, we removed reads that aligned to more than one transcript using samtools<sup>3</sup>. This results in a lower retrieval fraction of the generated reads using STAR than when using markerQuant. It shows that while STAR may also be able to discern between the native and watermarked transcripts, markerQuant is able to retrieve a higher fraction of the reads.

|                    | Generated counts |      |      |      | Star Quant |     |     |     | MarkerQuant |     |     |     | Star % Retrieved |      |      |      |      | MarkerQuant % Retrieved |      |      |      |      |
|--------------------|------------------|------|------|------|------------|-----|-----|-----|-------------|-----|-----|-----|------------------|------|------|------|------|-------------------------|------|------|------|------|
|                    | S1               | S2   | S3   | S4   | S1         | S2  | S3  | S4  | S1          | S2  | S3  | S4  | S1               | S2   | S3   | S4   | Mean | S1                      | S2   | S3   | S4   | Mean |
| <b>ADH1_coding</b> | 158              | 195  | 751  | 838  | 74         | 79  | 317 | 392 | 85          | 95  | 377 | 452 | 46,8             | 40,5 | 42,2 | 46,8 | 44,1 | 53,8                    | 48,7 | 50,2 | 53,9 | 51,7 |
| <b>ADH1_w</b>      | 725              | 828  | 167  | 191  | 315        | 368 | 70  | 89  | 375         | 433 | 84  | 108 | 43,4             | 44,4 | 41,9 | 46,6 | 44,1 | 51,7                    | 52,3 | 50,3 | 56,5 | 52,7 |
| <b>ADH3_coding</b> | 246              | 238  | 957  | 994  | 102        | 101 | 383 | 385 | 121         | 121 | 456 | 475 | 41,5             | 42,4 | 40,0 | 38,7 | 40,7 | 49,2                    | 50,8 | 47,6 | 47,8 | 48,9 |
| <b>ADH3_w</b>      | 977              | 917  | 288  | 248  | 401        | 352 | 120 | 99  | 458         | 430 | 141 | 116 | 41,0             | 38,4 | 41,7 | 39,9 | 40,3 | 46,9                    | 46,9 | 49,0 | 46,8 | 47,4 |
| <b>ENO2_coding</b> | 237              | 238  | 935  | 971  | 90         | 70  | 318 | 339 | 106         | 93  | 381 | 416 | 38,0             | 29,4 | 34,0 | 34,9 | 34,1 | 44,7                    | 39,1 | 40,7 | 42,8 | 41,8 |
| <b>ENO2_w</b>      | 1055             | 1018 | 273  | 211  | 327        | 361 | 98  | 64  | 408         | 414 | 116 | 80  | 31,0             | 35,5 | 35,9 | 30,3 | 33,2 | 38,7                    | 40,7 | 42,5 | 37,9 | 39,9 |
| <b>FBA1_coding</b> | 195              | 223  | 854  | 868  | 77         | 98  | 339 | 344 | 103         | 115 | 395 | 402 | 39,5             | 43,9 | 39,7 | 39,6 | 40,7 | 52,8                    | 51,6 | 46,3 | 46,3 | 49,2 |
| <b>FBA1_w</b>      | 793              | 822  | 271  | 219  | 321        | 336 | 99  | 87  | 369         | 402 | 118 | 102 | 40,5             | 40,9 | 36,5 | 39,7 | 39,4 | 46,5                    | 48,9 | 43,5 | 46,6 | 46,4 |
| <b>GPM1_coding</b> | 127              | 130  | 633  | 635  | 74         | 81  | 370 | 384 | 91          | 93  | 446 | 450 | 58,3             | 62,3 | 58,5 | 60,5 | 59,9 | 71,7                    | 71,5 | 70,5 | 70,9 | 71,1 |
| <b>GPM1_w</b>      | 599              | 596  | 134  | 139  | 344        | 369 | 86  | 78  | 428         | 435 | 100 | 104 | 57,4             | 61,9 | 64,2 | 56,1 | 59,9 | 71,5                    | 73,0 | 74,6 | 74,8 | 73,5 |
| <b>HXK2_coding</b> | 240              | 288  | 1084 | 1200 | 66         | 75  | 339 | 351 | 77          | 96  | 409 | 412 | 27,5             | 26,0 | 31,3 | 29,3 | 28,5 | 32,1                    | 33,3 | 37,7 | 34,3 | 34,4 |
| <b>HXK2_w</b>      | 1170             | 1162 | 277  | 218  | 342        | 337 | 82  | 61  | 400         | 408 | 95  | 71  | 29,2             | 29,0 | 29,6 | 28,0 | 29,0 | 34,2                    | 35,1 | 34,3 | 32,6 | 34,0 |
| <b>PDC1_coding</b> | 360              | 368  | 1331 | 1451 | 80         | 84  | 318 | 346 | 93          | 99  | 392 | 411 | 22,2             | 22,8 | 23,9 | 23,8 | 23,2 | 25,8                    | 26,9 | 29,5 | 28,3 | 27,6 |
| <b>PDC1_w</b>      | 1340             | 1343 | 307  | 323  | 336        | 323 | 88  | 86  | 397         | 390 | 104 | 101 | 25,1             | 24,1 | 28,7 | 26,6 | 26,1 | 29,6                    | 29,0 | 33,9 | 31,3 | 31,0 |
| <b>PFK1_coding</b> | 633              | 663  | 2523 | 2413 | 92         | 60  | 315 | 332 | 100         | 86  | 370 | 391 | 14,5             | 9,0  | 12,5 | 13,8 | 12,5 | 15,8                    | 13,0 | 14,7 | 16,2 | 14,9 |

|                    |      |      |      |      |     |     |     |     |     |     |     |     |             |      |      |      |             |             |      |      |      |             |
|--------------------|------|------|------|------|-----|-----|-----|-----|-----|-----|-----|-----|-------------|------|------|------|-------------|-------------|------|------|------|-------------|
| <b>PFK1_w</b>      | 2087 | 2388 | 609  | 598  | 286 | 286 | 88  | 61  | 341 | 337 | 101 | 75  | 13,7        | 12,0 | 14,4 | 10,2 | 12,6        | 16,3        | 14,1 | 16,6 | 12,5 | 14,9        |
| <b>PFK2_coding</b> | 514  | 561  | 2367 | 2342 | 58  | 84  | 305 | 298 | 77  | 103 | 377 | 365 | 11,3        | 15,0 | 12,9 | 12,7 | 13,0        | 15,0        | 18,4 | 15,9 | 15,6 | 16,2        |
| <b>PFK2_w</b>      | 2174 | 2316 | 608  | 542  | 273 | 307 | 78  | 92  | 316 | 358 | 87  | 104 | 12,6        | 13,3 | 12,8 | 17,0 | 13,9        | 14,5        | 15,5 | 14,3 | 19,2 | 15,9        |
| <b>PGI1_coding</b> | 381  | 275  | 1302 | 1202 | 94  | 59  | 300 | 287 | 123 | 72  | 365 | 332 | 24,7        | 21,5 | 23,0 | 23,9 | 23,3        | 32,3        | 26,2 | 28,0 | 27,6 | 28,5        |
| <b>PGI1_w</b>      | 1228 | 1371 | 311  | 288  | 276 | 332 | 68  | 77  | 330 | 394 | 77  | 89  | 22,5        | 24,2 | 21,9 | 26,7 | 23,8        | 26,9        | 28,7 | 24,8 | 30,9 | 27,8        |
| <b>PGK1_coding</b> | 264  | 246  | 945  | 1015 | 100 | 84  | 327 | 352 | 112 | 105 | 381 | 410 | 37,9        | 34,1 | 34,6 | 34,7 | 35,3        | 42,4        | 42,7 | 40,3 | 40,4 | 41,5        |
| <b>PGK1_w</b>      | 941  | 1019 | 245  | 173  | 329 | 329 | 78  | 51  | 382 | 379 | 95  | 64  | 35,0        | 32,3 | 31,8 | 29,5 | 32,1        | 40,6        | 37,2 | 38,8 | 37,0 | 38,4        |
| <b>PYK1_coding</b> | 284  | 317  | 1408 | 1314 | 81  | 94  | 389 | 370 | 100 | 107 | 473 | 431 | 28,5        | 29,7 | 27,6 | 28,2 | 28,5        | 35,2        | 33,8 | 33,6 | 32,8 | 33,8        |
| <b>PYK1_w</b>      | 1283 | 1115 | 285  | 291  | 379 | 318 | 77  | 74  | 443 | 381 | 88  | 94  | 29,5        | 28,5 | 27,0 | 25,4 | 27,6        | 34,5        | 34,2 | 30,9 | 32,3 | 33,0        |
| <b>TDH3_coding</b> | 249  | 164  | 797  | 745  | 108 | 78  | 379 | 335 | 134 | 91  | 444 | 413 | 43,4        | 47,6 | 47,6 | 45,0 | 45,9        | 53,8        | 55,5 | 55,7 | 55,4 | 55,1        |
| <b>TDH3_w</b>      | 817  | 861  | 214  | 219  | 374 | 401 | 85  | 108 | 444 | 473 | 108 | 126 | 45,8        | 46,6 | 39,7 | 49,3 | 45,3        | 54,3        | 54,9 | 50,5 | 57,5 | 54,3        |
| <b>TPI1_coding</b> | 144  | 138  | 643  | 523  | 94  | 82  | 400 | 339 | 112 | 99  | 477 | 399 | 65,3        | 59,4 | 62,2 | 64,8 | 62,9        | 77,8        | 71,7 | 74,2 | 76,3 | 75,0        |
| <b>TPI1_w</b>      | 605  | 605  | 150  | 159  | 377 | 367 | 94  | 93  | 446 | 443 | 117 | 105 | 62,3        | 60,7 | 62,7 | 58,5 | 61,0        | 73,7        | 73,2 | 78,0 | 66,0 | 72,7        |
|                    |      |      |      |      |     |     |     |     |     |     |     |     | <b>Mean</b> |      |      |      | <b>35,0</b> | <b>Mean</b> |      |      |      | <b>41,8</b> |



**Table S4 – Plasmids used in this study**

| Plasmid name                                                    | Relevant genotype                                                                         | Source                                                |
|-----------------------------------------------------------------|-------------------------------------------------------------------------------------------|-------------------------------------------------------|
| pMEL10                                                          | <i>2 μm Amp<sup>R</sup> URA3<br/>SNR52p::gRNA-CAN1.Y::SUP4t</i>                           | 4                                                     |
| pROS12                                                          | <i>2 μm Amp<sup>R</sup><br/>hphNT1SNR52p::gRNA-CAN1.Y<br/>gRNA-ADE2.Y::SUP4t</i>          | 4                                                     |
| pROS13                                                          | <i>2 μm Amp<sup>R</sup> KanMX<br/>SNR52p::gRNA-CAN1.Y<br/>gRNA-ADE2.Y::SUP4t</i>          | 4                                                     |
| p426-SNR52pgRNA.<br>CAN1.Y-SUP4t                                | <i>2 μm Amp<sup>R</sup> URA3<br/>SNR52p::gRNA-CAN1.Y::SUP4t</i>                           | Addgene                                               |
| pUDR 529                                                        | <i>2 μm Amp<sup>R</sup> hphNT1<br/>SNR52p::gRNA-KIURA3::SUP4t</i>                         | This study                                            |
| pUDR531                                                         | <i>2 μm Amp<sup>R</sup> hphNT1<br/>SNR52p::gRNA-TPI1::SUP4t</i>                           | This study                                            |
| pUDR532                                                         | <i>2 μm Amp<sup>R</sup> hphNT1<br/>SNR52p::gRNA-PYK1::SUP4t</i>                           | This study                                            |
| pUDR413                                                         | <i>2 μm Amp<sup>R</sup> kanMX<br/>SNR52p::gRNA-CAN1.Y<br/>gRNA- RECYCLE SinLoG::SUP4t</i> | This study                                            |
| pUDR314                                                         | <i>2 μm Amp<sup>R</sup> AmdSYM<br/>SNR52p::gRNA-SGA1::SUP4t</i>                           | This study                                            |
| pUDC073                                                         | <i>CEN6/ARS4, URA3, GAL1p-I -<br/>SCEI-CYC1t</i>                                          | 4                                                     |
| pYTK002                                                         | <i>Cam<sup>R</sup>ConLS</i>                                                               | 5                                                     |
| pYTK047                                                         | <i>Cam<sup>R</sup>GFP</i>                                                                 | 5                                                     |
| pYTK072                                                         | <i>Cam<sup>R</sup>ConRE</i>                                                               | 5                                                     |
| pYTK078                                                         | <i>Cam<sup>R</sup>cloNAT<sup>R</sup></i>                                                  | 5                                                     |
| pYTK081                                                         | <i>Cam<sup>R</sup>CEN6/ARS4</i>                                                           | 5                                                     |
| pYTK083                                                         | <i>Cam<sup>R</sup>Amp<sup>R</sup>-ColE1</i>                                               | 5                                                     |
| pGGKd012                                                        | <i>CEN6/ARS4 cloNAT<sup>R</sup> GFP</i>                                                   | This study, kindly provided by Arthur Gorter de Vries |
| <b>Promoter and terminator part plasmids used in this study</b> |                                                                                           |                                                       |
| Plasmid name                                                    | Relevant genotype                                                                         | Source                                                |
| pUD565                                                          | <i>Cam<sup>R</sup>GFP</i>                                                                 | GeneArt                                               |
| pGGKp096                                                        | <i>Cam<sup>R</sup> pHXK2 Sc</i>                                                           | GeneArt                                               |
| pGGKp097                                                        | <i>Cam<sup>R</sup>tHXK2Sc</i>                                                             | GeneArt                                               |
| pGGKp098                                                        | <i>Cam<sup>R</sup> pPGI1Sc</i>                                                            | GeneArt                                               |
| pGGKp099                                                        | <i>Cam<sup>R</sup> tPGI1Sc</i>                                                            | GeneArt                                               |
| pGGKp100                                                        | <i>Cam<sup>R</sup> pPFK1Sc</i>                                                            | GeneArt                                               |
| pGGKp101                                                        | <i>Cam<sup>R</sup> tPFK1Sc</i>                                                            | GeneArt                                               |
| pGGKp102                                                        | <i>Cam<sup>R</sup> pPFK2Sc</i>                                                            | GeneArt                                               |

|                                                              |                                             |            |
|--------------------------------------------------------------|---------------------------------------------|------------|
| pGGKp103                                                     | Cam <sup>R</sup> tPFK2Sc                    | GeneArt    |
| pGGKp104                                                     | Cam <sup>R</sup> pFBA1Sc                    | GeneArt    |
| pGGKp105                                                     | Cam <sup>R</sup> tFBA1Sc                    | GeneArt    |
| pGGKp106                                                     | Cam <sup>R</sup> tTDH3Sc                    | GeneArt    |
| pGGKp107                                                     | Cam <sup>R</sup> tGPM1Sc                    | GeneArt    |
| pGGKp108                                                     | Cam <sup>R</sup> tPYK1Sc                    | GeneArt    |
| pGGKp109                                                     | Cam <sup>R</sup> pPDC1Sc                    | GeneArt    |
| pGGKp110                                                     | Cam <sup>R</sup> tPDC1Sc                    | GeneArt    |
| pGGKp111                                                     | Cam <sup>R</sup> pADH1Sc                    | GeneArt    |
| pGGKp114                                                     | Cam <sup>R</sup> pTPI1Sc                    | GeneArt    |
| pGGKp115                                                     | Cam <sup>R</sup> tTPI1Sc                    | GeneArt    |
| pGGKp116                                                     | Cam <sup>R</sup> pPGM1Sc                    | GeneArt    |
| pGGKp117                                                     | Cam <sup>R</sup> pPYK1Sc                    | GeneArt    |
| Watermarked coding sequence part plasmids used in this study |                                             |            |
| Plasmid name                                                 | Relevant genotype                           | Source     |
| pGGKp137                                                     | Cam <sup>R</sup> ADH1_*Sc                   | GeneArt    |
| pGGKp139                                                     | Cam <sup>R</sup> ENO2_*Sc                   | GeneArt    |
| pGGKp140                                                     | Cam <sup>R</sup> FBA1_*Sc                   | GeneArt    |
| pGGKp141                                                     | Cam <sup>R</sup> PGM1_*Sc                   | GeneArt    |
| pGGKp142                                                     | Cam <sup>R</sup> HXK2_*Sc                   | GeneArt    |
| pGGKp143                                                     | Cam <sup>R</sup> PDC1_*Sc                   | GeneArt    |
| pGGKp144                                                     | Cam <sup>R</sup> PFK1_*Sc                   | GeneArt    |
| pGGKp145                                                     | Cam <sup>R</sup> PFK2_*Sc                   | GeneArt    |
| pGGKp146                                                     | Cam <sup>R</sup> PGI1_*Sc                   | GeneArt    |
| pGGKp147                                                     | Cam <sup>R</sup> PGK1_*Sc                   | GeneArt    |
| pGGKp148                                                     | Cam <sup>R</sup> PYK1_*Sc                   | GeneArt    |
| pGGKp149                                                     | Cam <sup>R</sup> TDH3_*Sc                   | GeneArt    |
| pGGKp150                                                     | Cam <sup>R</sup> TPI1_*Sc                   | GeneArt    |
| Watermarked expression plasmids used in this study           |                                             |            |
| pUDC212                                                      | CEN6/ARS6 AmpR<br>pFBA1Sc-FBA1_*Sc-tFBA1Sc  | This study |
| pUDC213                                                      | CEN6/ARS6 AmpR<br>pPGM1Sc-PGM1_*Sc-tPGM1Sc  | This study |
| pUDC214                                                      | CEN6/ARS6 AmpR<br>pHXK2Sc-HXK2_*Sc-tHXK2Sc  | This study |
| pUDC215                                                      | CEN6/ARS6 AmpR<br>pPDC1Sc-PDC1_*Sc-tPDC1Sc  | This study |
| pUDC216                                                      | CEN6/ARS6 AmpR<br>pPFK1Sc-PFK1_*Sc-tPDC1Sc  | This study |
| pUDC217                                                      | CEN6/ARS6 AmpR<br>pPFK2Sc-PFK2_*Sc-tPFK2Sc  | This study |
| pUDC219                                                      | CEN6/ARS6 AmpR<br>pPGK1Sc-PGK1_*Sc-tPGK1Sc  | This study |
| pUDC220                                                      | CEN6/ARS6 AmpR<br>pPYK1Sc-PYK1_*Sc-tPYK1Sc  | This study |
| pUDC222                                                      | CEN6/ARS6 AmpR pTPI1Sc-<br>TPI1_*Sc-tTDH3Sc | This study |
| pUDC229                                                      | CEN6/ARS6 AmpR<br>pADH1Sc-ADH1_*Sc-tADH1Sc  | This study |
| pUDC230                                                      | CEN6/ARS6 AmpR                              | This study |

|         |                                                     |            |
|---------|-----------------------------------------------------|------------|
|         | <i>pTDH3Sc-TDH3_*Sc-tTDH3Sc</i>                     |            |
| pUDC231 | <i>CEN6/ARS6 AmpR<br/>pENO2Sc-ENO2_*Sc-tENO2Sc</i>  | This study |
| pUDC232 | <i>CEN6/ARS6 AmpR pPGI1Sc-<br/>PGI1_*Sc-tPGI1Sc</i> | This study |

## Table S5 – Whole genome sequencing of the constructed strains

List of mutations in glycolytic expression cassettes and helper elements in IMX1770, IMX1771 and IMX2028 as compared to the parental strain IMX589.

|                | <b>Fragment</b>         | <b>Location</b> | <b>Mutation</b> |
|----------------|-------------------------|-----------------|-----------------|
| <b>IMX1770</b> | <i>PFK1</i> promoter    | -581            | A > AT          |
|                | <i>PGK1</i> terminator  | 211             | G > GA          |
|                | <i>ENO2</i> terminator  | 280             | C > A           |
|                | <i>HIS3</i> promoter    | -132            | C > CA          |
| <b>IMX1771</b> | <i>GPM1</i> promoter    | -459            | CTATATATATA > C |
|                | <i>HIS3</i> terminator  | 114             | C > CA          |
| <b>IMX2028</b> | <i>GPM1</i> promoter    | -459            | CTATATATATA > C |
|                | <i>HIS3</i> terminator  | 114             | C > CA          |
|                | <i>FBA1</i> terminator* | 294             | CA>C            |
|                | <i>PFK2</i> promoter*   | -22             | A>G             |

\* In watermarked glycolysis cassette.

**Table S6 – gRNA sequence for selective gene editing**

| Gene        | Native gRNA sequence                    | Watermarked gRNA sequence                |
|-------------|-----------------------------------------|------------------------------------------|
| <i>PGK1</i> | TTGAATCTTGTCAGCAACCT <u>GG</u>          | TTGAATCTTGTCAGCAACCT <u>TTG</u>          |
| <i>PYK1</i> | ACTTAGCAAT <b>CA</b> ATTTCTTT <u>GG</u> | ACTTAGCAAT <b>TA</b> ATTTCTTT <u>GT</u>  |
| <i>PDC1</i> | GTGGAATTCGACAATGTTCTT <u>GG</u>         | GTGGAATTCGACAATGTTCTT <u>TTG</u>         |
| <i>TPI1</i> | AACAACATC <b>C</b> AAAGTCTTAC <u>GG</u> | AACAACATC <b>T</b> AAAGTCTTAC <u>TTG</u> |

For each native glycolytic gene targeted for DNA editing, the PAM is underlined. In The corresponding watermarked gene, the bases modified to prevent editing by Cas9 are shown in red bold font. Only gRNA's for *PYK1* and *TPI1* were used in this study.

**Table S7 – List of primers used in this study**

**A. Primers used for construction of IMX1338**

| Fragment                                                 | Primer name               | Primer number | Primer sequence                                                                                                |
|----------------------------------------------------------|---------------------------|---------------|----------------------------------------------------------------------------------------------------------------|
| gRNA <i>S. pombe His5</i>                                | 10904_Sphis5_targetRNA_FW | 10904         | TGCGCATGTTTCGGCGTTCGAACTTCTCCGCAGTGAAA<br>GATAAATGATCATAAACAACCATGGGTAGGAGTTTTAGA<br>GCTAGAAATAGCAAGTTAAAATAAG |
| Repair with <i>GAL1p</i> - <i>-I Scel</i> – <i>ADH1t</i> | 10708_glk1oh_prGAL1_FW    | 10708         | aaaccacaacaccaccactaatacaactctatcatacac<br>aagatgGCAGTGAGCGCAACGCAATTAATG                                      |
| Repair with <i>GAL1p</i> - <i>-I Scel</i> – <i>ADH1t</i> | 10709_glk1oh_terCYC1_RV   | 10709         | gtacggtgggatacgtacacaaacccaaaaaaatgtaaaa<br>agatcaCGACTCACTATAGGGCGAATTGG                                      |
| <i>S. pombe His5</i>                                     | His5 ORF fwd              | 6190          | CCATGCGCGCGGCTACTAG                                                                                            |
| <i>glk1</i> flank                                        | GLK1RV1                   | 1461          | CCCGTTTCCGATGATATTG                                                                                            |
| <i>glk1</i> flank                                        | GLK1FW3                   | 1553          | AAAAACGGGAAATAACAATAACGAC                                                                                      |
| <i>S. pombe His5</i>                                     | His5 ORF rv               | 6189          | CTACAAAAGCCCTCCTACCCATGG                                                                                       |

**B. Primers used to add SHR sequences to the SinLoG fragments for assembly**

| Fragment      | Primer name          | Primer number | Primer Sequence                                                                           |
|---------------|----------------------|---------------|-------------------------------------------------------------------------------------------|
| <i>ARS418</i> | ARS418 Fw + Tag CAN1 | 12953         | GGTGTATGACTTATGAGGGTGAGAATGCGAAATGGCGTGGGAATGTGATTAA<br>AGGTAATATGAAAGTTTATGTTTTTTCCTGGA  |
|               | ARS418 Rv + AH       | 12954         | CTCAGCCTTAGCCAATATGATCATGTCGTTGCGTCTCGGACCATCTAGTCTA<br>CTCTGAAGTTGAAAAGCAATATTTAAATATAGA |
|               | ARS418-SGA1          | 14624         | TTTTTCTCATCTCTTGGCTCTGGATCCGTTATCTGTTCTGTTACACAAG<br>AAATCGTACATTGAAAGTTTATGTTTTTCA       |

|             |                    |       |                                                                                            |
|-------------|--------------------|-------|--------------------------------------------------------------------------------------------|
| <i>FBA1</i> | FBA1 Fw + H        | 12955 | GTCACGGGTTCTCAGCAATTCGAGCTATTACCGATGATGGCTGAGGCGTTAG<br>AGTAATCTAACGTGAACAACAATACCAGCCTTC  |
|             | FBA1 Rv + Tag CAN1 | 12956 | CTTCAGAGTAGACTAGATGGTCCGAGACGCAACGACATGATCATATTGGCTA<br>AGGCTGAGAATGAGCTATCAAAAACGATAGATC  |
| <i>TPI1</i> | TPI Fw + H         | 12957 | AGATTACTCTAACGCCTCAGCCATCATCGGTAATAGCTCGAATTGCTGAGAA<br>CCCGTGACAACGAAGACCCAGAGATGTTGTTGT  |
|             | TPI Rv + P         | 12958 | CTGATAGTGCTGTAAGTCGCCTCCATCTTAGCAGAGCTGTCCCTGAATGCGT<br>ACTCGTGATGAGTAACCCATATAGAGATCGTAC  |
| <i>PGK1</i> | PGK1 Fw + Q        | 13223 | GAGCTGAATGTATATGCTGCGGGATCATTGCACAGCTCTGAGAGCCCTGCAA<br>CGCGATATTCTTTTTATTAACCTTAATTTTTTAT |
|             | PGK1 Rv + P        | 13224 | TCACGAGTACGCATTCAGGGACAGCTCTGCTAAGATGGAGGCGACTTACAGC<br>ACTATCAGAAAATAATATCCTTCTCGAAAGCTTT |
| <i>ADH1</i> | ADH1 Fw + N        | 12961 | TTCTAGGCTTTGATGCAAGGTCCACATATCTTCGTTAGGACTCAATCGTGGC<br>TGCTGATCAACGAAGTCCAATGCTAGTAGAGAA  |
|             | ADH1 Rv + Q        | 13225 | ATATCGCGTTGCAGGGCTCTCAGAGCTGTGCAATGATCCCGCAGCATATACA<br>TTCAGCTCTTGTCTCTGAGGACATAAAATACA   |
| <i>PYK1</i> | PYK1 Fw + N        | 12963 | GATCAGCAGCCACGATTGAGTCCTAACGAAGATATGTGGACCTTGCATCAAA<br>GCCTAGAAAACGTGGTCAAACCTCAGAACTAAG  |
|             | PYK1 Rv + O        | 12964 | ATACTCCCTGCACAGATGAGTCAAGCTATTGAACACCGAGAACGCGCTGAAC<br>GATCATTCATAATCATGATAACCTTGAGGGAAG  |
| <i>TDH3</i> | TDH3 Fw + A        | 13226 | GTGCCTATTGATGATCTGGCGGAATGTCTGCCGTGCCATAGCCATGCCTTCA<br>CATATAGTATACTAGCGTTGAATGTTAGCGTCA  |

|             |              |       |                                                                                                |
|-------------|--------------|-------|------------------------------------------------------------------------------------------------|
|             | TDH3 Rv + O  | 12966 | GAATGATCGTTCAGCGCGTTCTCGGTGTTCAATAGCTTGACTCATCTGTGCA<br>GGGAGTATATCCTGGCGGAAAAAATTCATTTGT      |
| <i>ENO2</i> | ENO2 Fw + A  | 12967 | ACTATATGTGAAGGCATGGCTATGGCACGGCAGACATTCGCCAGATCATCA<br>ATAGGCACAACGGATGATGAAAACACTAAACGA       |
|             | ENO2 Rv + B  | 13227 | GTTGAACATTCTTAGGCTGGTCGAATCATTTAGACACGGGCATCGTCCTCTC<br>GAAAGGTGTAACGAAGACGTTACCAGCTGATTG      |
| <i>HXK2</i> | HXK2 Fw + B  | 12969 | CACCTTTCGAGAGGACGATGCCCGTGTCTAAATGATTCGACCAGCCTAAGAA<br>TGTTCAACAACGACGCTGGTAAAGTACAGCTAC      |
|             | HXK2 Rv + C  | 12970 | CTAGCGTGTCCCTCGCATAGTTCTTAGATTGTGCGCTACGGCATATACGATCCG<br>TGAGACGTACTIONTGAACAATAAATACGAAATCCT |
| <i>PGI1</i> | PGI1 Fw + D  | 12971 | AATCACTCTCCATACAGGGTTTCATACATTTCTCCACGGGACCCACAGTCGT<br>AGATGCGTAACGTATTCTTAGTGGATAACATGC      |
|             | PGI1 Rv + C  | 12972 | ACGTCTCACGGATCGTATATGCCGTAGCGACAATCTAAGAACTATGCGAGGA<br>CACGCTAGTTTTTAAACAGTTGATGAGAACCCTTT    |
| <i>PFK1</i> | PFK1 Fw + D  | 12973 | ACGCATCTACGACTGTGGGTCCCGTGGAGAAATGTATGAAACCCTGTATGGA<br>GAGTGATTAACGCGGCTAGTAAAAAGAAAAAT       |
|             | PFK1 Rv + J  | 12974 | CGACGAGATGCTCAGACTATGTGTTCTACCTGCTTGGACATCTTCGCGTATA<br>TGACGGCCATTCCATAGCTTAGTTTTAATCAAGG     |
| <i>PFK2</i> | PFK2 Fw + BP | 12975 | GAGATGACTGGGTCCACTCTTTCTGTGATTTTCGAGAGAGCGATACGCATGTC<br>TCCATCGTAACGATTCTCTGCTGCTTTGTTGCA     |
|             | PFK2 Rv + J  | 12976 | GGCCGTCATATACGCGAAGATGTCCAAGCAGGTAGAACACATAGTCTGAGCA<br>TCTCGTCGAAATCGTCTATATCACATATTCCAG      |



|                |                       |       |                                                                                            |
|----------------|-----------------------|-------|--------------------------------------------------------------------------------------------|
| <i>HIS3</i>    | HIS3 Fw + BP          | 13268 | ACGATGGAGACATGCGTATCGCTCTCTCGAAATACACGAAAGAGTGGACCCA<br>GTCATCTCTGCGGCATCAGAGCAGATTGTACTG  |
|                | HIS3 Rv + L           | 12978 | GCCGTAGCTTCCGCAAGTATGCCGTAGTTGAAGAGCATTGCGGTCGGTTCA<br>GGTCATATGCATCTGTGCGGTATTTACACCCGC   |
| <i>URA3</i>    | URA3+BP               | 13271 | ACGATGGAGACATGCGTATCGCTCTCTCGAAATACACGAAAGAGTGGACC<br>CAGTCATCTCAACTGTCATCCTGCGTGAAGATTAA  |
|                | URA3 – Tag L          | 14623 | GCCGTAGCTTCCGCAAGTATGCCGTAGTTGAAGAGCATTGCGGTCGGTT<br>CAGGTCATATAGTGTTGCACCGTGCCAATG        |
| <i>GPM1</i>    | GPM1 Fw + M           | 12979 | ACGAGAGATGAAGGCTCACCGATGGACTTAGTATGATGCCATGCTGGAAGCT<br>CCGGTCATAACGGTGATACTTTGACAGGAGCTA  |
|                | GPM1 Rv + L           | 12980 | ATATGACCTGAACCGACGGCAAATGCTCTTCAACTACGGCATACTTGCGGAA<br>GCTACGGCTATTGCTATAACATGTCATGTCACC  |
| <i>PDC1</i>    | PDC1 Fw + M           | 12981 | ATGACCGGAGCTTCCAGCATGGCATCATACTAAGTCCATCGGTGAGCCTTCA<br>TCTCTCGTAACGCATGCGACTGGGTGAGCATAT  |
|                | PDC1 Rv + AR          | 12982 | TGACGAGATTTGAGAAGTCCCAATATCGACTCGTGATGTGCCATGCGTGCT<br>GTCAGTATACAGTGTTCCCTTAATCAAGGATACC  |
| <i>ARS1211</i> | ARS1211 Fw +AR        | 12983 | ATACTGACAGCACGCATGGCACATCACGAGTCGATATTGGGGACTTCTCAA<br>TCTCGTCAGACATAGTATTTGCAACCTTTTCAG   |
|                | ARS1211 Rv + Tag CAN1 | 12984 | GATGAGAAAAGTAAAGAATTGTATCCATTGCGCTCTTTCCCGACGAGAGTAA<br>ATGGCGAGGACAGGCGTTTCTGTACCGCTGTTA  |
|                | ARS1211 SHR SGA1      | 13270 | TCTCGCTTTTCTTTTATTTTTTTTTTGTCTACAACTCTGTAAAACCTTCTT<br>GTCTTATTTGGACAGGCGTTTCTGTACCGCTGTTA |

### C. Diagnostic primers used to confirm correct assembly of the SinLoG

| Fragment             | Primer name         | Primer number | Primer Sequence                                                                            |
|----------------------|---------------------|---------------|--------------------------------------------------------------------------------------------|
| <i>CAN1-ARS418</i>   | CAN1 PAGE rv        | 5822          | TGAAGGAGTTTCAAATGCTTCTAC                                                                   |
|                      | ARS418 Rv + AH      | 12954         | CTCAGCCTTAGCCAATATGATCATGTCGTTGCGTCTCGGACCATCTAGTCTACTCTGAAGTTGAA<br>AAGCAATATTTAAAATATAGA |
| <i>SGA1 – ARS418</i> | 11898_SeqFW_SGA     | 11898         | CGCGGAAACGGGTATTAGGG                                                                       |
|                      | ARS418 Rv + AH      | 12954         | CTCAGCCTTAGCCAATATGATCATGTCGTTGCGTCTCGGACCATCTAGTCTACTCTGAAGTTGAA<br>AAGCAATATTTAAAATATAGA |
| <i>CAN1-FBA1</i>     | CAN1 PAGE rv        | 5822          | TGAAGGAGTTTCAAATGCTTCTAC                                                                   |
|                      | FBA1 Flank left     | 5232          | ATTTTACTCACGCTTGAAATTAACGGC                                                                |
| <i>SGA1 – FBA1</i>   | 11898_SeqFW_SGA     | 11898         | CGCGGAAACGGGTATTAGGG                                                                       |
|                      | FBA1 Flank left     | 5232          | ATTTTACTCACGCTTGAAATTAACGGC                                                                |
| <i>FBA1-TPI1</i>     | FBA1 Flank right FW | 5026          | CGTATTACGATAATCCTGCTGTC                                                                    |
|                      | 11213_gntK_RV_seq4  | 11213         | ACCGAGGTGGTATCCGAGAG                                                                       |
| <i>TPI1-PGK1</i>     | FK115               | 2554          | GTGGCATGTGAGATTCTCC                                                                        |
|                      | pPGK1_fw 1          | 8739          | GCTGCTACTGTTGCAAAGGC                                                                       |
| <i>PGK1-ADH1</i>     | 10131_AL_ctrl_rv    | 10131         | TGAGGGTAACATCAATTCAAGAAG                                                                   |

|                  |                            |       |                                      |
|------------------|----------------------------|-------|--------------------------------------|
|                  | ADH1 Flank left RV         | 5043  | CGAGCAAATGCCTGCAAATCG                |
| <i>ADH1-PYK1</i> | YAT2_2                     | 7496  | CAGCTCTGGAACAACGACATCTG              |
|                  | 11927_pPYK1_seq_5          | 11927 | CATTTAGCTTGCCGAAAAA                  |
| <i>PYK1-TDH3</i> | J_FW (PDH con-struct ctrl) | 2914  | GTCGTCATAACGATGAGGTGTTGC             |
|                  | Sc_TDH3_T_RV               | 6493  | GTGAATTTACTTTAAATCTTGCAATTTAAATAAATT |
| <i>TDH3-ENO2</i> | Ptdh3 Ctrl Rv2             | 1523  | GGGCATGTACGGGTACAG                   |
|                  | ENO2 Flank left RV         | 5013  | GGCGTGCGGTGTGTAGATGTATC              |
| <i>ENO2-HXK2</i> | FK244                      | 4034  | CACCTTTCGAGAGGACGATG                 |
|                  | B-reverse                  | 2364  | ACGGAATAGAACACGATATTTGC              |
| <i>HXK2-PGI1</i> | Probe HXK2 fw              | 2818  | CACAAGCCAGAAAGGGTTCC                 |
|                  | G_RV_EF                    | 5643  | ACATTAAAGCTATATTATAAGCAAAG           |
| <i>PGI1-PFK1</i> | m-PCR-HR2-RV               | 2669  | GCGCGTGGCTTCCTATAATC                 |
|                  | Sc PUT1 SDC fw             | 3268  | GTGGCGCTATTTCCCTTATC                 |
| <i>PFK1-PFK2</i> | 11621_FW_PFK1_seq2         | 11621 | CAATTGCGTGACGGTAGAAC                 |
|                  | Q-PFK2-FW                  | 739   | TTGGTGGTTTCGAAGCTTTTG                |
| <i>PFK2-HIS3</i> | FG-forward                 | 2371  | TGTCTTACCCTGGACGGTATC                |

|                     |                 |       |                                                                                           |
|---------------------|-----------------|-------|-------------------------------------------------------------------------------------------|
|                     | FK074           | 1978  | CGCTTTACTAGGGCTTTCTG                                                                      |
| <i>PFK2-URA3</i>    | FG-forward      | 2371  | TGTCTTACCCTGGACGGTATC                                                                     |
|                     | B-forward       | 2363  | TTACCACCATCCAATGCAGAC                                                                     |
| <i>HIS3-GPM1</i>    | diag primer 3fw | 5898  | TCCCTCCACCAAAGGTGTTT                                                                      |
|                     | GPM1 FW         | 3321  | TTAGTTAGACACGGTCAATCC                                                                     |
| <i>URA3-GPM1</i>    | KIURA3 C        | 170   | TTGGCTAATCATGACCCC                                                                        |
|                     | GPM1 FW         | 3321  | TTAGTTAGACACGGTCAATCC                                                                     |
| <i>GPM1-PDC1</i>    | GPM1_P_FW       | 6344  | TATTGTAATATGTGTGTTTGGATTATTAAG                                                            |
|                     | PDC1_P_RV       | 6351  | TTTGATTGATTTGACTGTGTTATTTGCG                                                              |
| <i>PDC1-CAN1</i>    | Q-PDC1-FW       | 757   | GCTTTCGTCACCCCAATGG                                                                       |
|                     | CAT2promDiagfw  | 7317  | GCCGGTCACAACCTCTTTC                                                                       |
| <i>PDC1-SGA1</i>    | Q-PDC1-FW       | 757   | GCTTTCGTCACCCCAATGG                                                                       |
|                     | Q_OutsideSGA_RV | 7479  | GGACGTTCCGACATAGTATC                                                                      |
| <i>ARS1211-CAN1</i> | ARS1211 Fw +AR  | 12983 | ATACTGACAGCAGCATGGCACATCACGAGTCGATATTGGGGACTTCTCAAATCTCGTCAGACAT<br>AGTATTTTCGCAACCTTTCAG |
|                     | CAT2promDiagfw  | 7317  | GCCGGTCACAACCTCTTTC                                                                       |
| <i>ARS1211-SGA1</i> | ARS1211 Fw +AR  | 12983 | ATACTGACAGCAGCATGGCACATCACGAGTCGATATTGGGGACTTCTCAAATCTCGTCAGACAT<br>AGTATTTTCGCAACCTTTCAG |
|                     | Q_OutsideSGA_RV | 7479  | GGACGTTCCGACATAGTATC                                                                      |

**D. Primers used for confirmation of integration of the *KIURA3* repair fragment**

| Fragment         | Primer name     | Primer number | Primer Sequence       |
|------------------|-----------------|---------------|-----------------------|
| <i>SGA1-SGA1</i> | SeqFW_SGA       | 11898         | CGCGGAAACGGGTATTAGGG  |
|                  | Q_OutsideSGA_RV | 7479          | GGACGTTCCGACATAGTATC  |
| <i>SGA1-URA3</i> | SeqFW_SGA       | 11898         | CGCGGAAACGGGTATTAGGG  |
|                  | B-forward       | 2363          | TTACCACCATCCAATGCAGAC |
| <i>URA3-SGA</i>  | KIURA3 C        | 170           | TTGGCTAATCATGACCCC    |
|                  | Q_OutsideSGA_RV | 7479          | GGACGTTCCGACATAGTATC  |

**E. Primers used to amplify promoter and terminator sequences of the SinLoG**

| Fragment             | Primer name                    | Primer number | Sequence                                            |
|----------------------|--------------------------------|---------------|-----------------------------------------------------|
| <i>ENO2</i> promoter | tENO2 Fw                       | 13228         | GCATCGTCTCATCGGTCTCAATCCAGTGCTTTTAACTAAGAATTATTAG   |
|                      | tENO2 Rv                       | 13229         | ATGCCGTCTCAGGTCTCACAGCTAACGAAGACGTTACCAGCTGATTG     |
| <i>TDH3</i> promoter | pTDH3 Fw                       | 13230         | AAGCATCGTCTCATCGGTCTCAAACGATACTAGCGTTGAATGTTAGCGTCA |
|                      | 10754_TDH3 sc prom rv Ytoolkit | 10754         | TTATGCCGTCTCAGGTCTCACATA                            |

|                           |                                   |       |                                                      |
|---------------------------|-----------------------------------|-------|------------------------------------------------------|
|                           | pPGK1 Fw                          | 13231 | AAGCATCGTCTCATCGGTCTCAAACGTCTTTTTATTAACCTTAATTTTTAT  |
| <i>PGK1</i><br>promoter   | 9422 PGK1 sc prom rev<br>Ytoolkit | 9422  | TTATGCCGTCTCAGGTCTCACATA                             |
| <i>ADH1</i><br>terminator | ADH1 sc term Ytoolkit             | 10769 | AAGCATCGTCTCATCGGTCTCAATCCGCGAATTTCTTATGATTTATGATTTT |
|                           | 10770_ADH1<br>term rv Ytoolkit    | 10770 | TTATGCCGTCTCAGGTCTCACAGCCAACAGGTGTTGTCCTCTG          |
| <i>PGK1</i><br>terminator | 10763_PGK1<br>term fw Ytoolkit    | 10763 | AAGCATCGTCTCATCGGTCTCAATCCATTGAATTGAATTGAAATCGATAG   |
|                           | 10764_PGK1<br>term rv Ytoolkit    | 10764 | TTATGCCGTCTCAGGTCTCACAGCCGAAATAATATCCTTCTCGAAAG      |

## F. Primers used for construction of pUDR413

| Primer name            | Number | Primer Sequence                                                                                                               |
|------------------------|--------|-------------------------------------------------------------------------------------------------------------------------------|
| CRISPR RNA Recycl fw   | 6131   | TGCGCATGTTTCGGCGTTCGAAACTTCTCCGCAGTGAAAGATAAAATGATCTTACAATATAGTGATAATCGGTTTTAGAGCTAGAAA<br>TAGCAAGTTAAAATAAGGCTAGTCCGTTATCAAC |
| 2mu inside rv          | 5975   | AACGAGCTACTAAAATATTGCGAA                                                                                                      |
| 2mu inside fw-2        | 6296   | GTTCTACAAAAATGCATCCCGAG                                                                                                       |
| LP crRNA rv            | 5941   | GCTGGCCTTTTGCTCACATG                                                                                                          |
| AmdS CRISPR fw<br>PAGE | 6070   | TGCGCATGTTTCGGCGTTCGAAACTTCTCCGCAGTGAAAGATAAAATGATCCATTTACAATATAGTGATAATCGGTTTTAGAGCTAG<br>AAATAGCAAGTTAAAATAAGGCTAGTCCGTTATC |
| for f3h                | 3841   | CACCTTTCGAGAGGACGATG                                                                                                          |

## G. Primers used for the construction and confirmation of the gRNA plasmid for selective removal of the native glycolytic gene copy and their corresponding repair fragments

| Primer name                              | Number | Primer Sequence                                                                                              |
|------------------------------------------|--------|--------------------------------------------------------------------------------------------------------------|
| <b>Construction of the gRNA plasmids</b> |        |                                                                                                              |
| TPI1_targetRNA fw                        | 14517  | TGCGCATGTTTCGGCGTTCGAAACTTCTCCGCAGTGAAAGATAAAATGATCAACAACATCCAAAGTCTTACGTTTT<br>AGAGCTAGAAATAGCAAGTTAAAATAAG |
| TPI1_targetRNA_dg rev                    | 14518  | GTAAGACTTTGGATGTTGTT                                                                                         |
| CDC19_targetRNA fw                       | 14519  | TGCGCATGTTTCGGCGTTCGAAACTTCTCCGCAGTGAAAGATAAAATGATCACTTAGCAATCAATTTCTTTGTTTT<br>AGAGCTAGAAATAGCAAGTTAAAATAAG |
| CDC19_targetRNA_dg rev                   | 14520  | AAAGAAATTGATTGCTAAGT                                                                                         |
| <b>Repair DNA</b>                        |        |                                                                                                              |

|                                             |       |                                                                                                                              |
|---------------------------------------------|-------|------------------------------------------------------------------------------------------------------------------------------|
| TPI1_repair oligo fw                        | 14525 | TGTTTGTATTCTTTTCTTGCTTAAATCTATAACTACAAAAACACATACATAAACTAAAAGATTAATATAATTAT<br>ATAAAAAATATTATCTTCTTTTCTTTATATCTAGTGTTATGTAAAA |
| TPI1_repair oligo rv                        | 14526 | TTTTACATAACACTAGATATAAAGAAAAGAAGATAATATTTTTATATAATTATATTAATCTTTTAGTTTATGTAT<br>GTGTTTTTTGTAGTTATAGATTTAAGCAAGAAAAGAATACAAACA |
| CDC19_repair oligo fw                       | 14527 | ATTATTCTCTCTTGTTTCTATTTACAAGACACCAATCAAACAAATAAAACATCATCACAAAAAGAATCATGAT<br>TGAATGAAGATATTATTTTTTTGAATTATATTTTTTAAATTTTAT   |
| CDC19_repair oligo rv                       | 14528 | ATAAAATTTAAAAAATATAATTCAAAAAATAATATCTTCATTCAATCATGATTCTTTTTTGTGATGATGTTTTTA<br>TTTGTTTTGATTGGTGTCTTGTAATAGAAACAAGAGAGAATAAT  |
| <b>Diagnostic PCR for selective editing</b> |       |                                                                                                                              |
| TPI1_diagnostic_FW                          | 3514  | CTGACAGGTGGTTTGTACG                                                                                                          |
| TPI1_diagnostic_FW                          | 6406  | CATTCACGAAATTTAAGTGGCTCAG                                                                                                    |
| PYK1_diagnostic_FW                          | 4667  | CCTTGAGGGAAGATTATCTTGCG                                                                                                      |
| PYK1_diagnostic_FW                          | 11915 | GAGTGAGTGCTTTGTTCAATGG                                                                                                       |



**Table S8 – RNA-Sequencing Depth**

| <b>Strain</b>      | <b>Replicate</b> | <b>Depth</b> |
|--------------------|------------------|--------------|
| <b>Native</b>      | 1                | 22089278     |
| <b>Native</b>      | 2                | 22216419     |
| <b>Native</b>      | 3                | 24257740     |
| <b>Watermarked</b> | 1                | 24070180     |
| <b>Watermarked</b> | 2                | 24780729     |
| <b>Watermarked</b> | 3                | 23334043     |
| <b>Double</b>      | 1                | 23480289     |
| <b>Double</b>      | 2                | 25448312     |
| <b>Double</b>      | 3                | 23022264     |

## Table S9 – Sampling OD for RNA seq

Optical density of IMX1770, IMX1771 and IMX2028 batch cultures analysed by RNA sequencing

| Strain  | Reactor | OD <sub>660</sub> |
|---------|---------|-------------------|
| IMX1770 | 27      | 7,8               |
| IMX1770 | 28      | 9,95              |
| IMX1770 | 29      | 8,25              |
| IMX1771 | 27      | 7,75              |
| IMX1771 | 28      | 8,05              |
| IMX1771 | 29      | 7,95              |
| IMX2028 | 27      | 4,5               |
| IMX2028 | 29      | 4,51              |
| IMX2028 | 30      | 5,79              |

Figure S1 - *In silico* comparison of two watermarking approaches for *ADH1*.

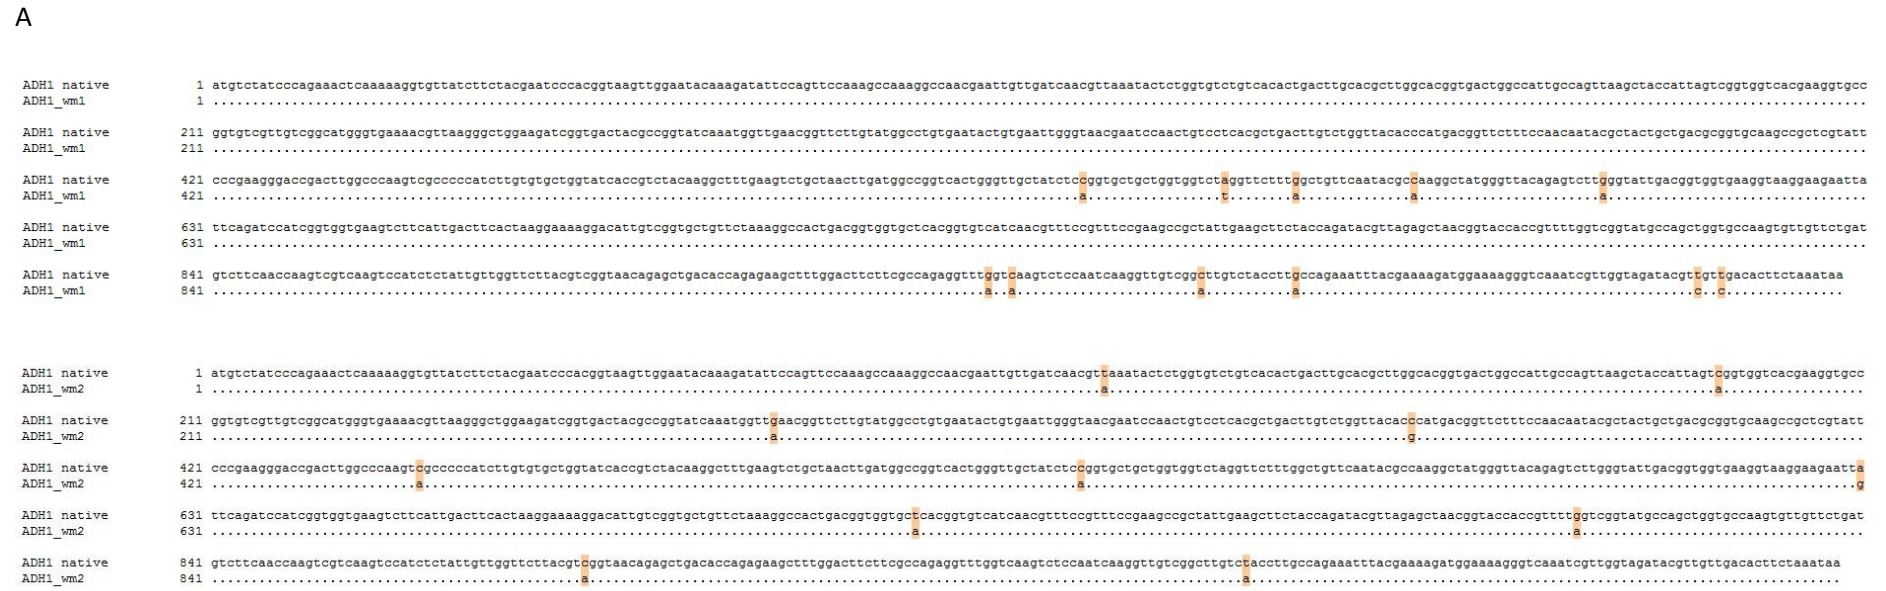

Alignment of the native and watermarked *ADH1* sequence using watermarking strategy 1 (two watermarking areas, A) or 2 (watermarks evenly spread over the coding region, B). Mismatches corresponding to the watermarks are highlighted in orange

## Figure S2 – step-by-step watermarking

### Introduction of watermark in CDS. Workflow

1. Open CDS se in Clone Manager.
2. Select first 101bp of sequence and annotate them as feature Region “buffer”. This fragment should be preserved to avoid alteration on the transcription level.
3. Go to the middle of CDS and proceed with the first watermark. Highlight central 100bp area and annotate it as a feature Region “watermark”.
4. Find 5-10 AA with 4 or 6 triplets (**AGPTVLR**S). Select those, so they are scattered along the whole 100bp and not grouped together (to make possible to detect watermark by program after).
5. Perform codon replacement on selected AA selecting an alternative codon (of the same AA) which has the closest percentage of similarity to the native variant in the sequence Codon usage table of *S. cerevisiae* attached). Annotate every change done as a Feature “Marker”. In the description mention how much % gain or loss did you introduce with this change.  
*Note: for the following codons changes should be avoided and only done if less than 5 changes will be done otherwise:*  
G (GGT) 61%  
R (AGA) 54%  
*For triplet’s replacement when fraction % will drop ~20% try to find alternatives to fulfil 5 bp change.*
6. Introduce 1 more watermark using the same algorithm at the end of the CDS (10 bp before the stop codon).
7. Add corresponding flanks to make the sequence compatible with the toolkit. Make sure there are no BsaI, BsmBI or NotI recognition sites in CDS (apart from the one present in the flank).

5': GCATCGTCTCATCGGTCTCATATG  
3': ATCCTGAGACCTGAGACGGCAT



Figure S4 – Genetic characterization of IMX2028

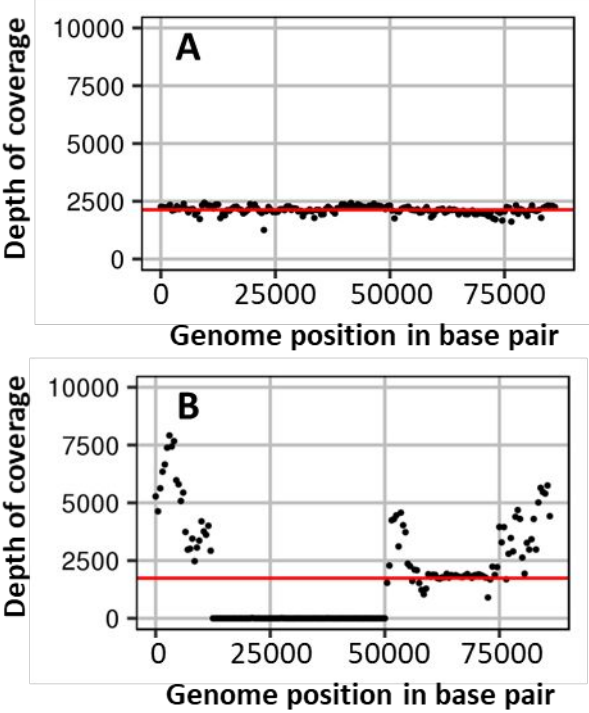

**A.** Coverage plot of mapped whole genome sequence reads of IMX1771 against the reference strain CEN.PK113-7D, only representing the mitochondrial genome. The uniform coverage around 2500 shows that IMX1771 mitochondrial genome is intact. **B.** Same plot as **A.** showing the coverage plot of the mitochondrial DNA of IMX2028 mapped against the reference strain CEN.PK113-7D. A large fraction of IMX2028 mitochondrial genome is missing. Black dots are averages over 500 bp non-overlapping windows and the red line depicts the median of the 500 bp non-overlapping windows.

Figure S5 – CO<sub>2</sub> profiles of batch cultures with IMX1770 and IMX1771

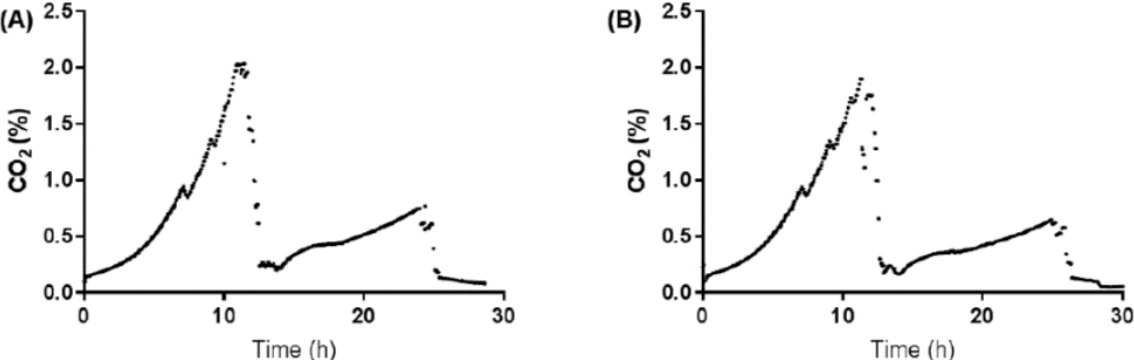

Growth profiles based on the CO<sub>2</sub> off-gas data of IMX1770 (A) and IMX1771 (B) when grown in aerobic batch cultures in bioreactors with glucose as sole carbon source. During the first 12-13 hours of culture, glucose was consumed and fermented into ethanol and other minor products. After glucose exhaustion (as seen by the fast drop in CO<sub>2</sub> in the off-gas) the strains used the fermentation products as carbon and energy sources to resume metabolic activity and growth.



**Figure S6 – Confirmation by Sanger sequencing of selective DNA editing**

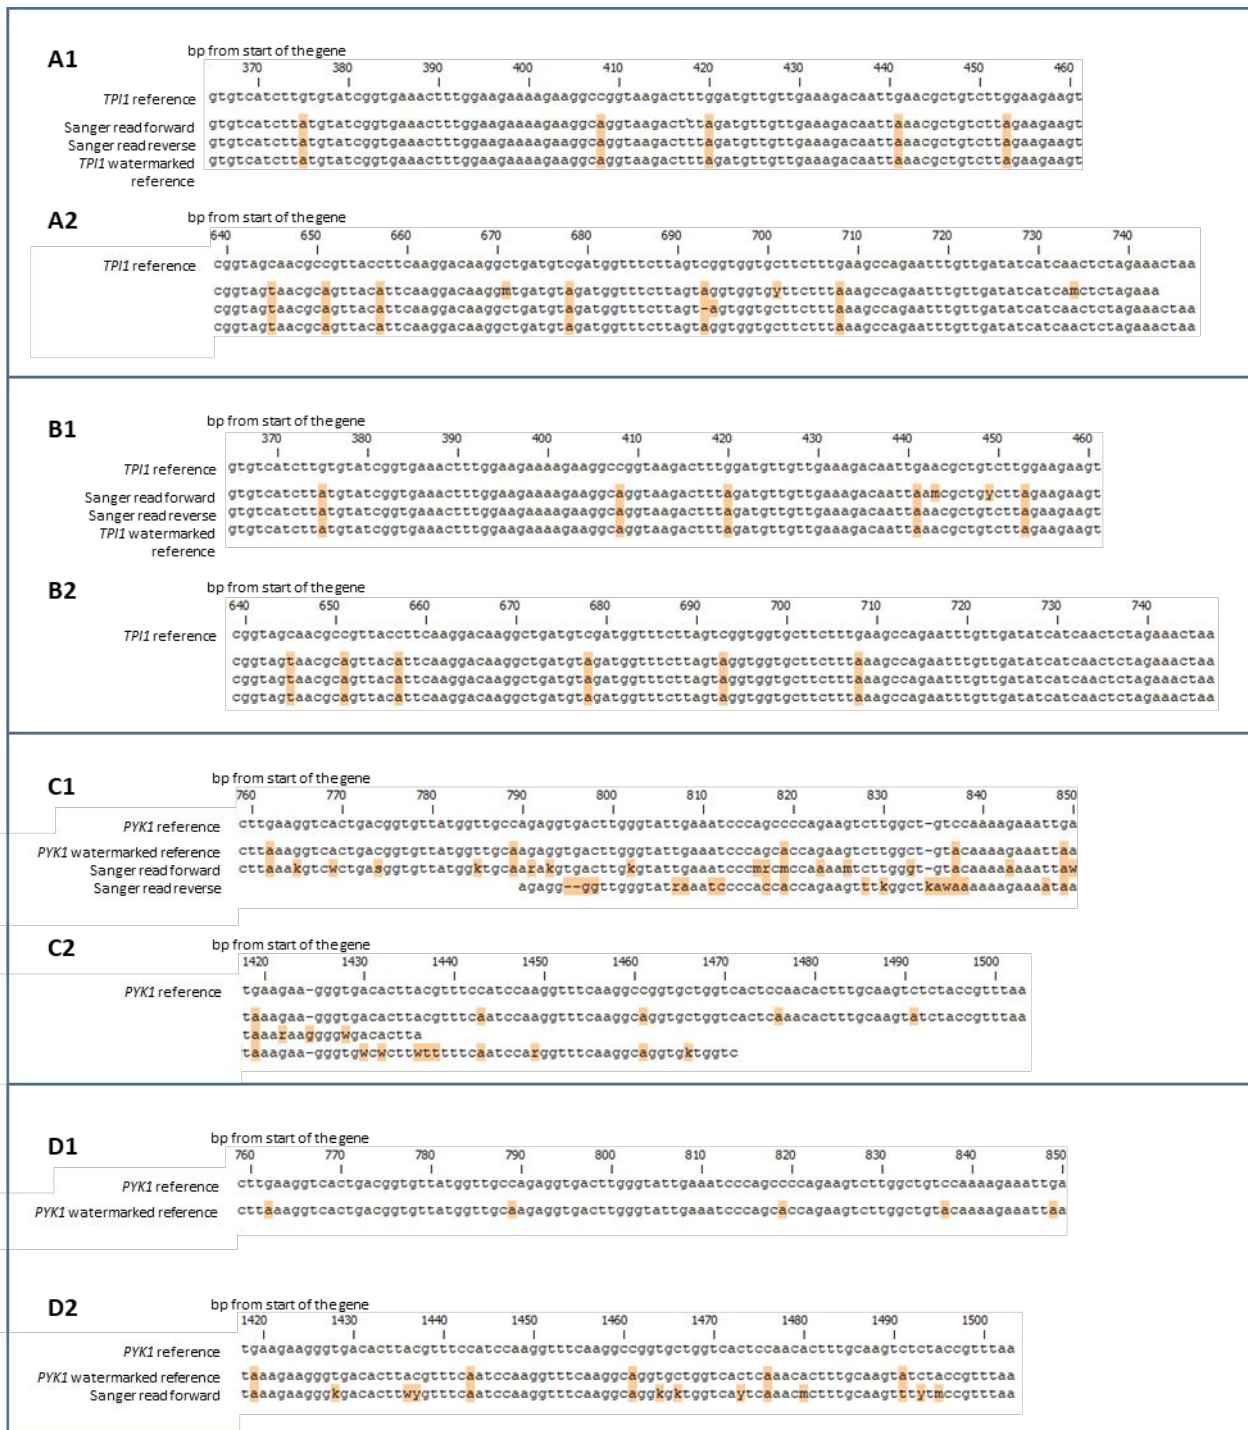

**Sequencing of the non-edited *TPI1* and *PYK1* genes after selective CRISPR-Cas selective editing.**

For *TPI1*, the band of 1125 bp for colonies number 9 and 10 showing two bands in the gel shown in Fig. 7A, was excised and purified using the Zymoclean Gel DNA Recovery kit. Sanger sequencing was performed according to BaseClear protocol with 15 ng/ 100bp and 25 pmol primer in a volume of 20 µl. Primers 3514 and 6406 were supplied for sequencing. **A1** and **B1**, sequence in the middle of *TPI1*



for colony 9 and 10, respectively. **A2** and **B2**, sequence at the end of *TPI1* until the stop codon for colony 9 and 10 respectively.

For *PYK1*, the band of 2177 bp for colonies number 1 and 5 showing two bands in the gel shown in Fig. 7A, was excised and purified using the Zymoclean Gel DNA Recovery kit. Sanger sequencing was performed according to BaseClear protocol with 15 ng/100bp and 25 pmol primer in a volume of 20  $\mu$ l. Primers 745 and 4667 were supplied for sequencing. **C1** and **D1**, sequence in the middle of *PYK1* for colony 1 and 5, respectively. **C2** and **D2**, sequence at the end of *PYK1* until the stop codon for colony 1 and 5 respectively.

Figure S7 – PCR confirmation IMX1770 and IMX1771

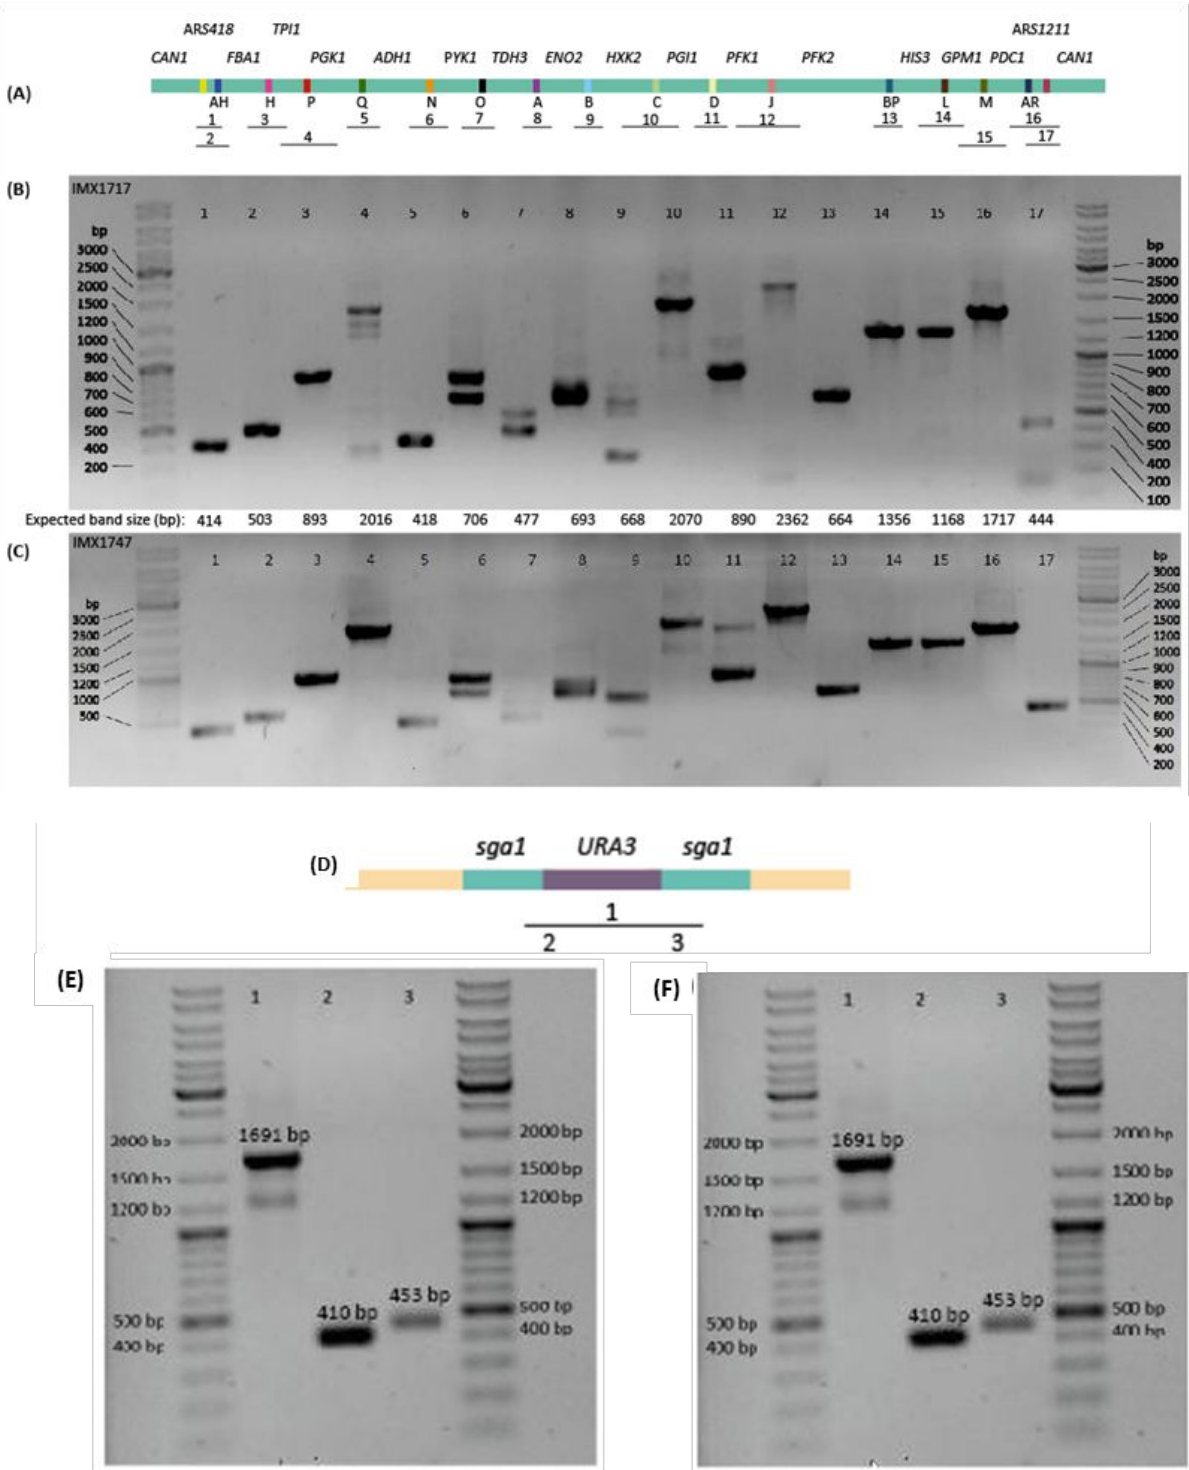

**PCR confirmation of the SinLoG strains.** (A) Schematic representation of the PCR setup to confirm integration of all fragments of the SinLoG. (B) Confirmation of integration of all SinLoG fragments in IMX1770. (C) Confirmation of integration of all SinLoG fragments in IMX1771. Confirmation of integration of the *KIURA3* repair fragment for the construction of IMX1770 and IMX1771. (D) Schematic representation of the PCR setup to confirm integration of the *KIURA3* gene in the *SGA1* locus. (E) Confirmation of *KIURA3* integration in strain IMX1770. (F) Confirmation of *KIURA3* integration in strain IMX1771.

Figure S8 - Label free quantification (LFQ) of glycolytic protein abundance

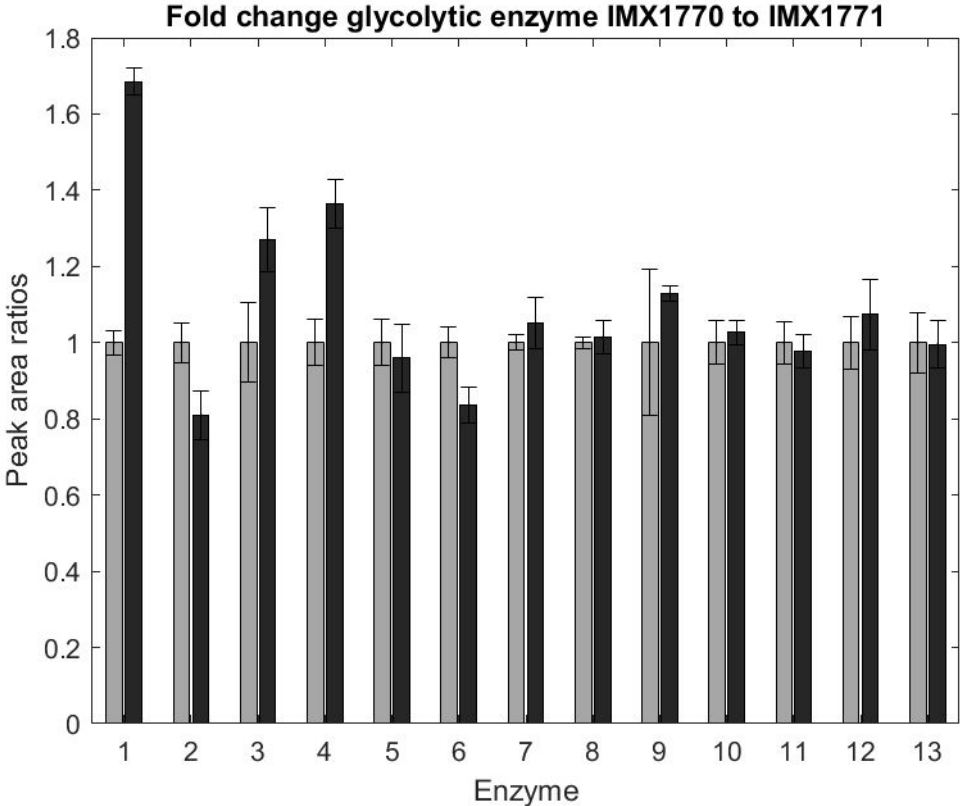

**Label free quantification (LFQ) of glycolytic protein abundance** of watermarked (IMX1770, grey bars) and non-watermarked strain (IMX1771, black bars). Data represent the average and standard deviation for three biological replicates. 1=Gpm1, 2=Tdh3, 3=Eno2, 4=Pyk1, 5=Tpi1, 6=Pfk2, 7=Hxk2, 8=Pfk1, 9=Fba1, 10=Pdc1, 11=Pgc1, 12=Pgi1, 13=Adh1. The fold change for Gpm1 is significantly different between the strains (Student t-test, p-value threshold 0.05, two-tailed test, homoscedastic).

Figure S9 – Specific activity of Gpm1 (phosphoglucomutase) in shake flask cultures

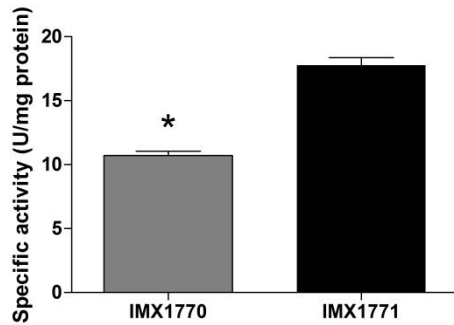

**Specific enzyme activity** of the Gpm1 enzyme from IMX1770 (watermarked) and IMX1770 (native) strains. Samples were taken in mid-exponential phase. Bars represent the average and standard deviation of measurements from three independent shake flasks for each strain. Stars indicate enzyme activities that are significantly different between the two strains (Student t-test, p-value threshold 0.05, two-tailed test, homoscedastic).

## Reference list

1. Dobin, A.; Davis, C. A.; Schlesinger, F.; Drenkow, J.; Zaleski, C.; Jha, S.; Batut, P.; Chaisson, M.; Gingeras, T. R., STAR: ultrafast universal RNA-seq aligner. *Bioinformatics* **2013**, *29* (1), 15-21.
2. Frazee, A. C.; Jaffe, A. E.; Langmead, B.; Leek, J. T., Polyester: simulating RNA-seq datasets with differential transcript expression. *Bioinformatics* **2015**, *31* (17), 2778-84.
3. Li, H.; Handsaker, B.; Wysoker, A.; Fennell, T.; Ruan, J.; Homer, N.; Marth, G.; Abecasis, G.; Durbin, R.; Genome Project Data Processing, S., The Sequence Alignment/Map format and SAMtools. *Bioinformatics* **2009**, *25* (16), 2078-9.
4. Kuijpers, N. G.; Chroumpi, S.; Vos, T.; Solis-Escalante, D.; Bosman, L.; Pronk, J. T.; Daran, J. M.; Daran-Lapujade, P., One-step assembly and targeted integration of multigene constructs assisted by the I-SceI meganuclease in *Saccharomyces cerevisiae*. *FEMS Yeast Res* **2013**, *13* (8), 769-81.
5. Lee, M. E.; DeLoache, W. C.; Cervantes, B.; Dueber, J. E., A highly characterized yeast toolkit for modular, multipart assembly. *ACS Synth. Biol* **2015**, *4* (9), 975-986.
